# Supplementary material for: Emerging investigator series: human CYP2A6 catalyzes the oxidation of 6:2 fluorotelomer alcohol
Source: Royal Society of Chemistry journal article supplement (doi:10.1039/d1em00307k), 2021-01-01
Supplement: d1em00307k1.pdf [file d1em00307k1.pdf]

## Supplementary Information

### Human CYP2A6 catalyzes the oxidation of 6:2 fluorotelomer alcohol

Oluwadamilola Daramola<sup>1</sup>, Amy A. Rand<sup>1</sup>

<sup>1</sup>Department of Chemistry and Institute of Biochemistry, Carleton University, 1125 Colonel By Drive, Ottawa, ON K1S 5B6, Canada

Email address: amy.rand@carleton.ca

### Table of Contents

|                                                                                               |   |
|-----------------------------------------------------------------------------------------------|---|
| <b>Table S1.</b> Spike and recovery data for 6:2 FTOH extracted from liver microsomes.....    | 2 |
| <b>Table S2.</b> Relative rates of 6:2 FTOH (10000 ng/mL) conversion with CYP inhibitors..... | 2 |
| <b>Table S3.</b> Relative rates of 6:2 FTOH (1000 ng/mL) conversion with CYP inhibitors.....  | 2 |
| <b>Table S4.</b> 6:2 FTOH (10000 ng/mL) incubation with recombinant CYP2A6.....               | 3 |
| <b>Table S5.</b> Rates of 6:2 FTOH (10000 ng/mL) conversion with recombinant CYP2A6.....      | 3 |
| <b>Table S6.</b> 6:2 FTOH (1000 ng/mL) incubation with recombinant CYP2A6.....                | 3 |
| <b>Table S7.</b> Rates of 6:2 FTOH (1000 ng/mL) conversion with recombinant CYP2A6.....       | 3 |
| <b>Table S8.</b> Michaelis kinetics of 6:2 FTOH in liver microsomes.....                      | 4 |
| <b>Table S9.</b> Rates of 6:2 FTOH conversion with recombinant CYP3A4.....                    | 4 |
| <b>Figure S1.</b> 6:2 FTOH metabolizes by human recombinant CYP2A6.....                       | 5 |
| <b>Figure S2.</b> 6:2 FTOH does not metabolize by human recombinant CYP3A4.....               | 6 |

| Spiked concentration (ng/mL) | Recovered concentration (ng/mL) | Recovery (%) |
|------------------------------|---------------------------------|--------------|
| 1000                         | 1020 ± 20                       | 102 ± 2.0    |
| 4000                         | 3800 ± 41                       | 95 ± 1.0     |
| 8000                         | 7120 ± 31                       | 89 ± 0.4     |
| 15000                        | 9900 ± 100                      | 66 ± 0.7     |
| 50000                        | 27500 ± 81                      | 55 ± 0.2     |

**Table S1.** Spike and recovery data for 6:2 FTOH. Recovery values were obtained in triplicate after 2 hour incubations in 100 mM phosphate buffer and the NADPH recombinant system.

| Treatment                                           | Rate relative to control (%) |
|-----------------------------------------------------|------------------------------|
| Uninhibited control                                 | 100.0 ± 5.3                  |
| Chloramphenicol (CYP2C19), 30 µM                    | 87.5 ± 8.3                   |
| Diallyl disulfide (CYP2E1), 68 µM                   | 97.2 ± 12.7                  |
| Sulfaphenazole (CYP2C9), 30 µM                      | 95.2 ± 7.0                   |
| Quinidine (CYP2D6), 30 µM                           | 84.1 ± 10.2                  |
| Ketoconazole (CYP3A4), 18 µM                        | 58.4 ± 7.3                   |
| Tranlycypromine, HCl (CYP2A6), 50 µM                | 40.7 ± 5.3                   |
| 1-Aminobenzotriazole (General CYP inhibitor), 75 µM | 62.9 ± 1.0                   |

**Table S2.** Relative metabolic rates of 6:2 FTOH conversion in the presence of competitive CYP inhibitors. The starting concentration of 6:2 FTOH is 10000 ng/mL. Standard deviations are derived from n=3 replicates.

| Treatment                            | Rate relative to control (%) |
|--------------------------------------|------------------------------|
| Uninhibited control                  | 100.0 ± 2.4                  |
| Chloramphenicol (CYP2C19), 30 µM     | 120.7 ± 0.9                  |
| Diallyl disulfide (CYP2E1), 68 µM    | 100.2 ± 0.3                  |
| Sulfaphenazole (CYP2C9), 30 µM       | 101.7 ± 1.8                  |
| Quinidine (CYP2D6), 30 µM            | 99.0 ± 4.0                   |
| Ketoconazole (CYP3A4), 18 µM         | 60.4 ± 7.3                   |
| Tranlycypromine, HCl (CYP2A6), 50 µM | 37.6 ± 4.1                   |

1-Aminobenzotriazole (General CYP inhibitor), 75  $\mu$ M

66.1  $\pm$  11.2

**Table S3.** Relative metabolic rates of 6:2 FTOH conversion in the presence of competitive inhibitors. The starting concentration of 6:2 FTOH is 1000 ng/mL. Standard deviations are derived from n=3 replicates.

| Treatment                          | 6:2 FTOH levels over time (ng/mL) |               |               |               |
|------------------------------------|-----------------------------------|---------------|---------------|---------------|
|                                    | 17 hr                             | 20 hr         | 25 hr         | 31 hr         |
| Active CYP2A6                      | 4811 $\pm$ 11                     | 4709 $\pm$ 20 | 4520 $\pm$ 10 | 4464 $\pm$ 15 |
| Tranlycypromine, HCl, 17.5 $\mu$ M | 4523 $\pm$ 5                      | 4510 $\pm$ 25 | 4502 $\pm$ 13 | 4497 $\pm$ 13 |
| Tranlycypromine, HCl, 35 $\mu$ M   | 4493 $\pm$ 17                     | 4492 $\pm$ 13 | 4493 $\pm$ 15 | 4488 $\pm$ 20 |
| Blank                              | 4497 $\pm$ 20                     | 4500 $\pm$ 19 | 4499 $\pm$ 20 | 4493 $\pm$ 17 |

**Table S4.** 6:2 FTOH conversion by human recombinant CYP2A6 with and without the inhibitor tranlycypromine. The initial concentration of 6:2 FTOH is 10000 ng/mL. The concentration of CYP2A6 is 1.5  $\mu$ g/mL. Standard deviations are acquired from n = 3 replicates.

| Treatment                          | 6:2 FTOH loss rate |
|------------------------------------|--------------------|
| Active CYP2A6                      | 282.2 $\pm$ 56.0   |
| Tranlycypromine, HCl, 17.5 $\mu$ M | 21.2 $\pm$ 5.2     |
| Tranlycypromine, HCl, 35 $\mu$ M   | 3.9 $\pm$ 1.9      |
| Blank                              | 2.0 $\pm$ 6.5      |

**Table S5.** Metabolic rates of inhibited and uninhibited 6:2 FTOH conversion in the presence of human recombinant CYP2A6. The initial concentration of 6:2 FTOH is 10000 ng/mL. The concentration of CYP2A6 is 1.5  $\mu$ g/mL. Standard deviations are acquired from n = 3 replicates.

| Treatment                        | 6:2 FTOH levels over time (ng/mL) |               |               |               |
|----------------------------------|-----------------------------------|---------------|---------------|---------------|
|                                  | 17 hr                             | 20 hr         | 25 hr         | 31 hr         |
| Active CYP2A6                    | 948 $\pm$ 3                       | 919 $\pm$ 11  | 875 $\pm$ 5   | 822 $\pm$ 3   |
| Tranlycypromine, HCl, 35 $\mu$ M | 1090 $\pm$ 3                      | 1090 $\pm$ 6  | 1085 $\pm$ 5  | 1083 $\pm$ 3  |
| Blank                            | 1111 $\pm$ 15                     | 1109 $\pm$ 20 | 1110 $\pm$ 10 | 1107 $\pm$ 13 |

**Table S6.** 6:2 FTOH conversion by human recombinant CYP2A6 with and without the inhibitor tranylcypromine. The initial concentration of 6:2 FTOH is 1000 ng/mL. The concentration of CYP2A6 is 1.5  $\mu$ g/mL. Standard deviations are acquired from n = 3 replicates.

| Treatment                        | 6:2 FTOH loss rate |
|----------------------------------|--------------------|
| Active CYP2A6                    | 100.8 $\pm$ 3.3    |
| Tranylcypromine, HCl, 35 $\mu$ M | 6.0 $\pm$ 5.3      |
| Blank                            | 2.0 $\pm$ 6.0      |

**Table S7.** Metabolic rates of inhibited and uninhibited 6:2 FTOH conversion in the presence of human recombinant CYP2A6. The initial concentration of 6:2 FTOH is 1000 ng/mL. The concentration of CYP2A6 is 1.5  $\mu$ g/mL. Standard deviations are acquired from n = 3 replicates.

| Treatment           | Concentration (ng/mL) | 6:2 FTOH loss rate (ng/mL min) | Specific rate (ng/min mg) |
|---------------------|-----------------------|--------------------------------|---------------------------|
| Uninhibited control | 1000                  | 12.1 $\pm$ 1.3                 | 60.5                      |
|                     | 2000                  | 24.0 $\pm$ 0.2                 | 119.9                     |
|                     | 4000                  | 37.8 $\pm$ 1.6                 | 188.8                     |
|                     | 7000                  | 35.9 $\pm$ 1.5                 | 179.6                     |
|                     | 8000                  | 43.7 $\pm$ 1.5                 | 218.6                     |
|                     | 9000                  | 43.8 $\pm$ 3.3                 | 218.9                     |
|                     | 15000                 | 52.3 $\pm$ 3.9                 | 261.5                     |
|                     | 20000                 | 60.5 $\pm$ 1.9                 | 302.4                     |
|                     | 50000                 | 64.0 $\pm$ 2.3                 | 320.0                     |
|                     | Tranylcypromine, HCl  | 1000                           | 6.7 $\pm$ 1.5             |
| 2000                |                       | 10.5 $\pm$ 1.0                 | 52.4                      |
| 4000                |                       | 21.6 $\pm$ 1.1                 | 108.1                     |
| 7000                |                       | 21.1 $\pm$ 0.8                 | 105.5                     |
| 8000                |                       | 30.1 $\pm$ 1.5                 | 150.8                     |
| 9000                |                       | 35.8 $\pm$ 3.0                 | 178.9                     |
| 15000               |                       | 46.5 $\pm$ 2.5                 | 232.7                     |
| 20000               |                       | 51.9 $\pm$ 1.9                 | 259.3                     |
| 50000               |                       | 56.1 $\pm$ 3.0                 | 280.4                     |

**Table S8.** Rate and specific rate of 6:2 FTOH transformation in human liver microsomes, in presence and absence of the CYP2A6 selective inhibitor tranylcypramine (50.0  $\mu$ M). Standard deviations are acquired from n = 3 replicates.

| Treatment                      | [6:2 FTOH]<br>(ng/ml) | 6:2 FTOH levels over time (ng/ml) |                |                   |                  |                   | Loss Rate<br>(ng/ml/min) |
|--------------------------------|-----------------------|-----------------------------------|----------------|-------------------|------------------|-------------------|--------------------------|
|                                |                       | 5 min                             | 30 min         | 60 min            | 90 min           | 120 min           |                          |
| Active<br>CYP3A4               | 10000                 | 5780 $\pm$<br>129                 | 5164 $\pm$ 188 | 4571 $\pm$<br>149 | 4755 $\pm$<br>93 | 4113 $\pm$ 79     | 12.8                     |
| Heat<br>inactivated<br>control | 10000                 | 6340 $\pm$<br>125                 | 5866 $\pm$ 35  | 5459 $\pm$<br>110 | 4983 $\pm$<br>77 | 4756<br>$\pm$ 130 | 13.9                     |
| Active<br>CYP3A4               | 1000                  | 852 $\pm$ 52                      | 747 $\pm$ 9    | 894 $\pm$ 21      | 842 $\pm$ 9      | 832 $\pm$ 19      | 0.21                     |
| Heat<br>inactivated<br>control | 1000                  | 846 $\pm$ 93                      | 866 $\pm$ 68   | 823 $\pm$ 40      | 835 $\pm$ 41     | 811 $\pm$ 20      | 0.35                     |

**Table S9.** 6:2 FTOH conversion by human recombinant CYP3A4. The initial concentration of 6:2 FTOH is 10000 or 1000 ng/mL. The concentration of CYP3A4 is 100  $\mu$ g/mL. Standard deviations are acquired from n = 3 replicates.

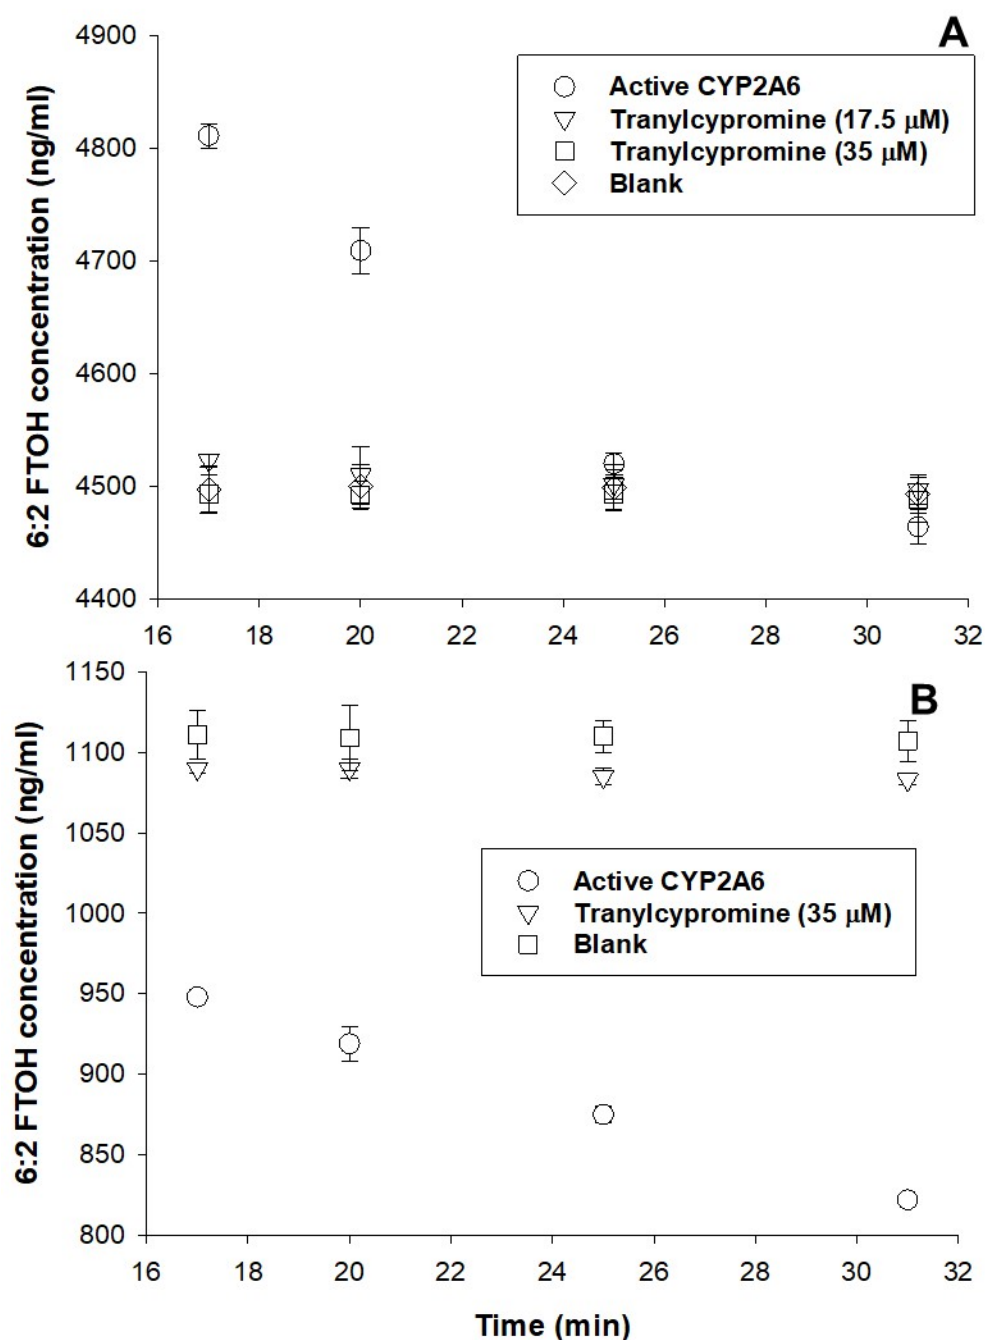

**Figure S1. 6:2 FTOH metabolizes by human recombinant CYP2A6.** 6:2 FTOH was incubated with human recombinant CYP2A6 (1.5  $\mu\text{g/mL}$ ) and a NADPH regeneration system in the presence and absence of the CYP2A6 selective inhibitor tranylcypromine. Panel A depicts the high concentration (10000 ng/mL) of 6:2 FTOH. Panel B depicts results with the low concentration (1000 ng/mL) of 6:2 FTOH. Blank assays were run in absence of enzyme. Standard deviations were derived from  $n=3$  replicates. Raw data used for this figure are reported in supplemental Tables S4 and S6.

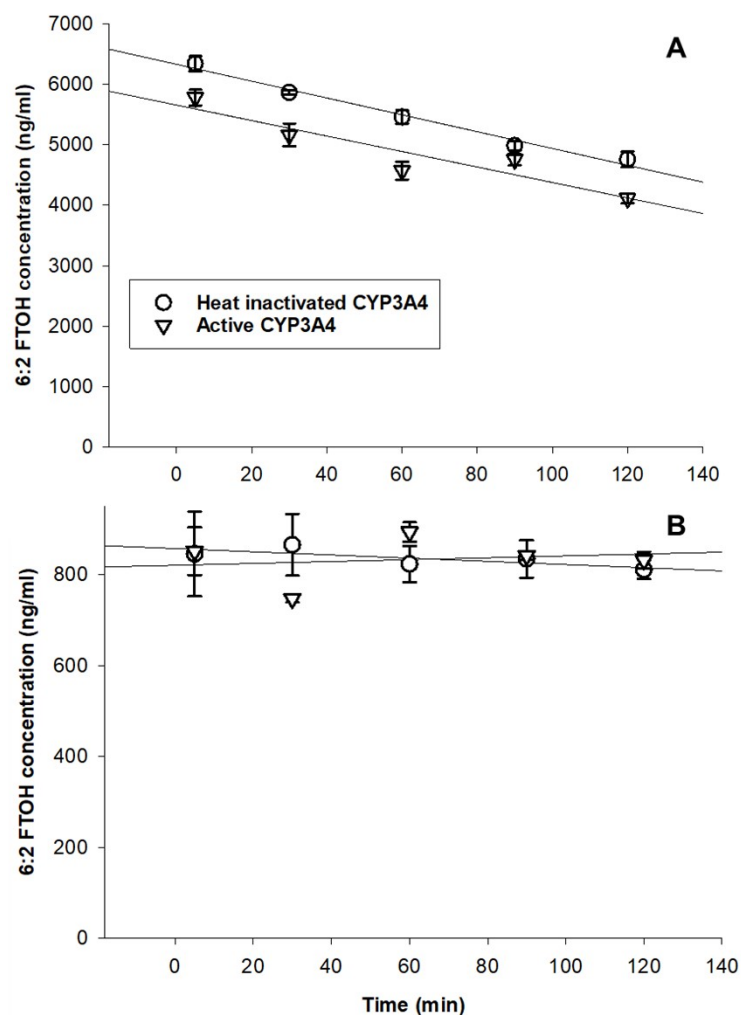

**Figure S2. 6:2 FTOH does not metabolize by human recombinant CYP3A4.** 6:2 FTOH was incubated with human recombinant CYP3A4 (100  $\mu\text{g}/\text{mL}$ ) and a NADPH regeneration system. As a negative control, the enzyme was heat inactivated. Panel A depicts the high concentration (10000 ng/mL) of 6:2 FTOH. Panel B depicts results with the low concentration (1000 ng/mL) of 6:2 FTOH. Standard deviations were derived from n=3 replicates. Raw data used for this figure are reported in supplemental Table S9.
